# Supplementary material
Source: publisher site journal article supplement (https://www.dovepress.com/article/245710)
Supplement: Supplementary file 1 [file get_supplementary_file.php]

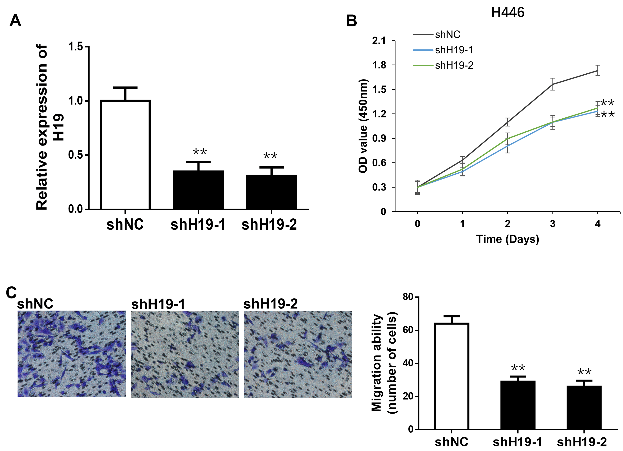


Fig.S1 H19 promoted SCLC cell proliferation and migration. (A) Relative expression levels of H19, measured by qPCR, in H446 cell after shRNA-mediated knockdown of H19. (B) Cell proliferation ability were detected in H446 cells which H19 was knocked down via shRNA. (C) Cell migration capacity were validated in H446 cells which H19 was knocked down. Data are reported as means ± SD. **P<0.01.
